# Supplementary material
Source: PubMed Central journal article supplement (PMC6934998)
Supplement: ASN.2019040416SupplementaryData.pdf [file ASN.2019040416SupplementaryData.pdf]

**Supplemental material to:**

Bae S, et al. Early Steroid Withdrawal in Deceased-Donor Kidney Transplant Recipients with Delayed Graft Function.

**Table of Contents**

|                                                                                                               |   |
|---------------------------------------------------------------------------------------------------------------|---|
| Supplemental Figure 1. Kaplan-Meier cumulative incidence plot for death-censored graft failure and death..... | 1 |
| Supplemental Table 1. Coefficients from the inverse probability of treatment weights model.....               | 2 |

**Supplemental Figure 1. Kaplan-Meier cumulative incidence plot for death-censored graft failure and death.**

(a) Death-censored graft failure

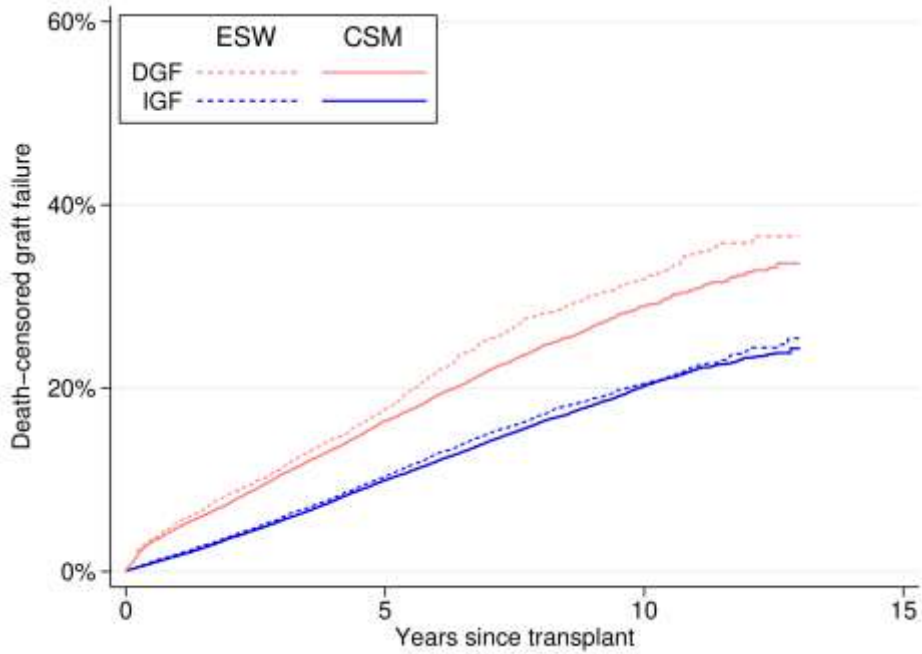

(b) Death

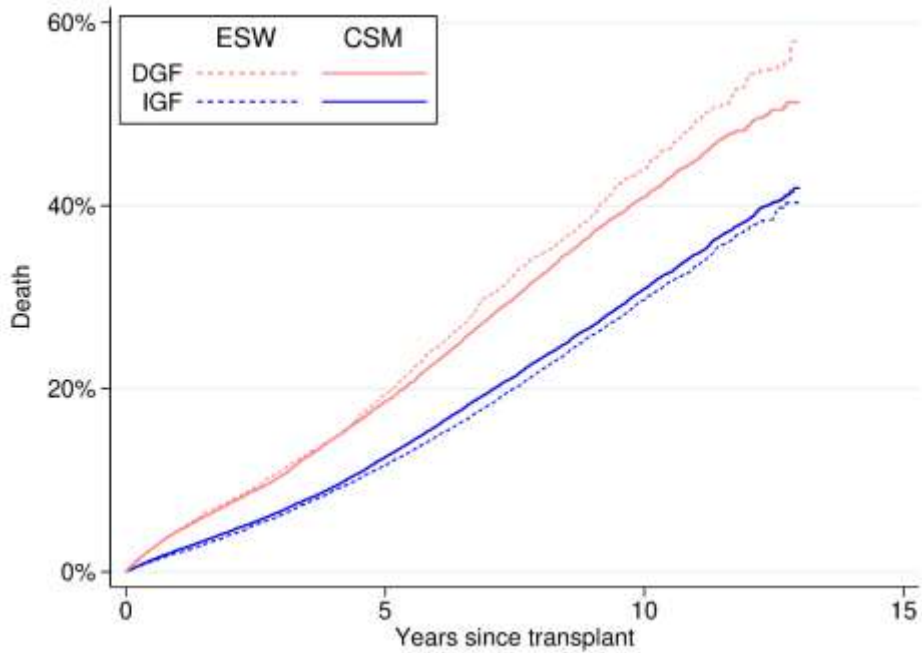

ESW, early steroid withdrawal; CSM, conventional steroid maintenance; DGF, delayed graft function; and IGF, immediate graft function.

**Supplemental Table 1. Coefficients from the inverse probability of treatment weights model.**

| Factor                                | Log(OR) | 95% CI           |
|---------------------------------------|---------|------------------|
| Constant                              | -0.892  | (-1.300, -0.483) |
| <b>Recipient factors</b>              |         |                  |
| Age (<40)                             | -0.003  | (-0.007, 0.001)  |
| Age (≥40)                             | 0.003   | (0.001, 0.004)   |
| Race (Ref: White)                     |         |                  |
| Black                                 | -0.187  | (-0.223, -0.151) |
| Hispanic                              | -0.080  | (-0.123, -0.037) |
| Other                                 | -0.027  | (-0.078, 0.024)  |
| Female                                | -0.046  | (-0.073, -0.019) |
| Panel reactive antibody (Ref: 0-9)    |         |                  |
| 10-79                                 | -0.230  | (-0.264, -0.196) |
| 80-100                                | -0.667  | (-0.729, -0.604) |
| Missing                               | -0.157  | (-0.222, -0.091) |
| Previous transplant                   | -0.547  | (-0.611, -0.483) |
| BMI, kg/m <sup>2</sup> (Ref: 18.5-25) |         |                  |
| <18.5                                 | -0.006  | (-0.121, 0.109)  |
| 25-30                                 | -0.010  | (-0.042, 0.022)  |
| ≥30                                   | 0.010   | (-0.023, 0.043)  |
| Missing                               | 0.076   | (-0.058, 0.209)  |
| Diabetes (Ref: No)                    |         |                  |
| Yes                                   | -0.004  | (-0.053, 0.046)  |
| Missing                               | -0.090  | (-0.259, 0.078)  |
| Hypertension (Ref: No)                |         |                  |
| Yes                                   | -0.003  | (-0.049, 0.043)  |
| Missing                               | -0.138  | (-0.195, -0.081) |
| Cause of ESRD (Ref: Diabetes)         |         |                  |
| Glomerulonephritis                    | -0.150  | (-0.209, -0.091) |
| Hypertension                          | 0.010   | (-0.045, 0.066)  |
| Others                                | -0.054  | (-0.111, 0.002)  |
| Preemptive transplant                 | 0.010   | (-0.054, 0.074)  |
| Years on dialysis (<2)                | 0.030   | (-0.001, 0.061)  |
| Years on dialysis (≥2)                | 0.000   | (-0.006, 0.005)  |
| Years on dialysis, missing            | -0.014  | (-0.164, 0.136)  |
| Serum albumin, g/dl (<3)              | -0.053  | (-0.167, 0.061)  |
| Serum albumin, g/dl (≥3)              | 0.030   | (0.001, 0.060)   |
| Serum albumin, missing                | -0.077  | (-0.153, -0.002) |
| Periphereral artery disease (Ref: No) |         |                  |
| Yes                                   | 0.062   | (0.009, 0.116)   |
| Unknown/missing                       | 0.156   | (0.058, 0.254)   |
| Malignancy (Ref: No)                  |         |                  |
| Yes                                   | -0.033  | (-0.089, 0.022)  |
| Unknown/missing                       | 0.078   | (-0.037, 0.192)  |

|                                          |        |                  |
|------------------------------------------|--------|------------------|
| HCV(+)                                   | 0.067  | (-0.002, 0.136)  |
| HBV(+)                                   | -0.016 | (-0.065, 0.033)  |
| HBV, missing                             | 0.102  | (0.056, 0.148)   |
| Education level (Ref: Below high school) |        |                  |
| Above high school                        | -0.002 | (-0.029, 0.025)  |
| Missing                                  | 0.082  | (0.027, 0.136)   |
| Medicare as primary payer                | -0.050 | (-0.078, -0.021) |
| <b>Donor factors</b>                     |        |                  |
| Age (<25)                                | 0.002  | (-0.002, 0.006)  |
| Age (≥25)                                | -0.001 | (-0.002, 0.000)  |
| Female                                   | 0.007  | (-0.020, 0.034)  |
| Race (Ref: White)                        |        |                  |
| Black                                    | 0.017  | (-0.021, 0.055)  |
| Hispanic                                 | -0.049 | (-0.089, -0.009) |
| Other                                    | -0.035 | (-0.109, 0.038)  |
| BMI, kg/m <sup>2</sup> (Ref: 18.5-25)    |        |                  |
| <18.5                                    | -0.005 | (-0.070, 0.061)  |
| 25-30                                    | -0.011 | (-0.042, 0.020)  |
| ≥30                                      | -0.026 | (-0.059, 0.008)  |
| Missing                                  | -0.142 | (-0.241, -0.043) |
| HLA-A mismatches (Ref: 0)                |        |                  |
| 1                                        | 0.001  | (-0.049, 0.050)  |
| 2                                        | -0.011 | (-0.060, 0.039)  |
| HLA-B mismatches (Ref: 0)                |        |                  |
| 1                                        | -0.088 | (-0.148, -0.028) |
| 2                                        | -0.087 | (-0.145, -0.028) |
| HLA-DR mismatches (Ref: 0)               |        |                  |
| 1                                        | -0.028 | (-0.067, 0.011)  |
| 2                                        | -0.060 | (-0.102, -0.019) |
| Induction agent (Ref: ATG)               |        |                  |
| None                                     | 0.006  | (-0.039, 0.052)  |
| IL2RA                                    | -0.551 | (-0.609, -0.493) |
| Alem                                     | 0.973  | (0.915, 1.031)   |
| Others                                   | 0.217  | (0.119, 0.315)   |
| HCV(+)                                   | 0.117  | (0.024, 0.211)   |
| Donation after cardiac death             | -0.088 | (-0.130, -0.045) |
| Diabetes (Ref: No)                       |        |                  |
| Yes                                      | 0.035  | (-0.016, 0.086)  |
| Missing                                  | -0.056 | (-0.272, 0.161)  |
| Hypertension (Ref: No)                   |        |                  |
| Yes                                      | 0.002  | (-0.031, 0.036)  |
| Missing                                  | 0.007  | (-0.185, 0.199)  |
| Stroke as the cause of donor death       | -0.016 | (-0.047, 0.016)  |
| Machine perfusion (Ref: No)              |        |                  |
| Yes                                      | -0.037 | (-0.070, -0.004) |
| Missing                                  | -0.034 | (-0.115, 0.048)  |

|                                                                     |        |                  |
|---------------------------------------------------------------------|--------|------------------|
| Terminal serum creatinine, mg/dl (<0.8)                             | 0.016  | (-0.096, 0.129)  |
| Terminal serum creatinine, mg/dl (≥0.8)                             | -0.012 | (-0.029, 0.006)  |
| Terminal serum creatinine, missing                                  | 1.118  | (0.434, 1.801)   |
| Cold ischemic time, Hr                                              | -0.002 | (-0.004, -0.001) |
| Cold ischemic time, missing                                         | 0.307  | (0.155, 0.460)   |
| Delayed graft function                                              | -0.474 | (-1.282, 0.335)  |
| <b>Among those with delayed graft function, add the terms below</b> |        |                  |
| Age (<40)                                                           | 0.010  | (0.000, 0.019)   |
| Age (≥40)                                                           | -0.002 | (-0.005, 0.001)  |
| Race (Ref: White)                                                   |        |                  |
| Black                                                               | 0.005  | (-0.064, 0.073)  |
| Hispanic                                                            | 0.033  | (-0.050, 0.116)  |
| Other                                                               | 0.083  | (-0.019, 0.185)  |
| Female                                                              | -0.042 | (-0.102, 0.018)  |
| Panel reactive antibody (Ref: 0-9)                                  |        |                  |
| 10-79                                                               | 0.071  | (0.006, 0.136)   |
| 80-100                                                              | 0.114  | (0.013, 0.215)   |
| Missing                                                             | 0.055  | (-0.077, 0.187)  |
| Previous transplant                                                 | 0.114  | (0.005, 0.223)   |
| BMI, kg/m <sup>2</sup> (Ref: 18.5-25)                               |        |                  |
| <18.5                                                               | 0.009  | (-0.285, 0.303)  |
| 25-30                                                               | 0.030  | (-0.041, 0.101)  |
| ≥30                                                                 | 0.016  | (-0.055, 0.087)  |
| Missing                                                             | -0.042 | (-0.322, 0.239)  |
| Diabetes (Ref: No)                                                  |        |                  |
| Yes                                                                 | 0.013  | (-0.087, 0.112)  |
| Missing                                                             | 0.111  | (-0.238, 0.461)  |
| Hypertension (Ref: No)                                              |        |                  |
| Yes                                                                 | 0.025  | (-0.072, 0.121)  |
| Missing                                                             | 0.060  | (-0.055, 0.175)  |
| Cause of ESRD (Ref: Diabetes)                                       |        |                  |
| Glomerulonephritis                                                  | -0.015 | (-0.135, 0.105)  |
| Hypertension                                                        | -0.028 | (-0.136, 0.080)  |
| Others                                                              | -0.029 | (-0.142, 0.083)  |
| Preemptive transplant                                               | -0.060 | (-0.254, 0.134)  |
| Years on dialysis (<2)                                              | -0.046 | (-0.121, 0.029)  |
| Years on dialysis (≥2)                                              | -0.003 | (-0.013, 0.007)  |
| Years on dialysis, missing                                          | -0.311 | (-0.683, 0.061)  |
| Serum albumin, g/dl (<3)                                            | -0.037 | (-0.267, 0.193)  |
| Serum albumin, g/dl (≥3)                                            | 0.052  | (-0.008, 0.111)  |
| Serum albumin, missing                                              | -0.006 | (-0.153, 0.142)  |
| Peripheral artery disease (Ref: No)                                 |        |                  |
| Yes                                                                 | -0.064 | (-0.166, 0.039)  |
| Unknown/missing                                                     | -0.230 | (-0.449, -0.012) |
| Malignancy (Ref: No)                                                |        |                  |
| Yes                                                                 | 0.068  | (-0.046, 0.182)  |

|                                          |        |                  |
|------------------------------------------|--------|------------------|
| Unknown/missing                          | 0.305  | (0.058, 0.551)   |
| HCV(+)                                   | -0.107 | (-0.245, 0.031)  |
| HBV(+)                                   | -0.043 | (-0.138, 0.052)  |
| HBV, missing                             | -0.154 | (-0.241, -0.066) |
| Education level (Ref: Below high school) |        |                  |
| Above high school                        | -0.018 | (-0.074, 0.038)  |
| Missing                                  | -0.155 | (-0.268, -0.043) |
| Medicare as primary payer                | 0.038  | (-0.016, 0.093)  |
| Age (<25)                                | 0.000  | (-0.009, 0.009)  |
| Age (≥25)                                | 0.000  | (-0.003, 0.003)  |
| Female                                   | 0.010  | (-0.046, 0.067)  |
| Race (Ref: White)                        |        |                  |
| Black                                    | 0.011  | (-0.069, 0.090)  |
| Hispanic                                 | 0.058  | (-0.024, 0.139)  |
| Other                                    | 0.030  | (-0.118, 0.178)  |
| BMI, kg/m <sup>2</sup> (Ref: 18.5-25)    |        |                  |
| <18.5                                    | -0.029 | (-0.190, 0.132)  |
| 25-30                                    | 0.013  | (-0.055, 0.081)  |
| ≥30                                      | 0.038  | (-0.032, 0.107)  |
| Missing                                  | 0.203  | (0.006, 0.401)   |
| HLA-A mismatches (Ref: 0)                |        |                  |
| 1                                        | -0.021 | (-0.126, 0.084)  |
| 2                                        | 0.013  | (-0.092, 0.117)  |
| HLA-B mismatches (Ref: 0)                |        |                  |
| 1                                        | 0.050  | (-0.083, 0.183)  |
| 2                                        | 0.063  | (-0.066, 0.192)  |
| HLA-DR mismatches (Ref: 0)               |        |                  |
| 1                                        | 0.013  | (-0.072, 0.098)  |
| 2                                        | 0.026  | (-0.063, 0.115)  |
| Induction agent (Ref: ATG)               |        |                  |
| None                                     | 0.173  | (0.085, 0.260)   |
| IL2RA                                    | -0.145 | (-0.241, -0.049) |
| Alem                                     | 0.018  | (-0.053, 0.088)  |
| Others                                   | 0.140  | (-0.025, 0.304)  |
| HCV(+)                                   | -0.003 | (-0.199, 0.192)  |
| Donation after cardiac death             | -0.035 | (-0.112, 0.041)  |
| Diabetes (Ref: No)                       |        |                  |
| Yes                                      | -0.031 | (-0.132, 0.069)  |
| Missing                                  | -0.048 | (-0.476, 0.379)  |
| Hypertension (Ref: No)                   |        |                  |
| Yes                                      | -0.049 | (-0.115, 0.017)  |
| Missing                                  | 0.112  | (-0.268, 0.491)  |
| Stroke as the cause of donor death       | 0.023  | (-0.041, 0.087)  |
| Machine perfusion (Ref: No)              |        |                  |
| Yes                                      | 0.034  | (-0.029, 0.097)  |
| Missing                                  | -0.129 | (-0.321, 0.063)  |

|                                                |        |                 |
|------------------------------------------------|--------|-----------------|
| Terminal serum creatinine, mg/dl (<0.8)        | -0.170 | (-0.416, 0.075) |
| Terminal serum creatinine, mg/dl ( $\geq$ 0.8) | 0.033  | (0.007, 0.059)  |
| Terminal serum creatinine, missing             | -0.608 | (-2.004, 0.788) |
| Cold ischemic time, Hr                         | 0.001  | (-0.002, 0.004) |
| Cold ischemic time, missing                    | -0.242 | (-0.561, 0.076) |

---
